# Supplementary material
Source: MDPI journal article supplement (https://www.mdpi.com/2674-0311/2/1/9)
Supplement: s1 [file s1]

**Table S1.** Electronic database search strategy

| Search | Query                                                                                 |
|--------|---------------------------------------------------------------------------------------|
| #15    | Search <b>#13 AND #14</b>                                                             |
| #14    | Search <b>English [Language]</b>                                                      |
| #13    | Search <b>#1 OR #2 OR #3 OR #4 OR #5 OR #6 OR #7 OR #8 OR #9 OR #10 OR #11 OR #12</b> |
| #12    | Search <b>"quorn"[Title/Abstract]</b>                                                 |
| #11    | Search <b>"quorn"[Text Word]</b>                                                      |
| #10    | Search <b>"mycoprotein"[Title/Abstract]</b>                                           |
| #9     | Search <b>"mycoprotein"[Text Word]</b>                                                |
| #8     | Search <b>"textured vegetable protein"[Title/Abstract]</b>                            |
| #7     | Search <b>"textured vegetable protein"[Text Word]</b>                                 |
| #6     | Search <b>"meat alternative"[Title/Abstract]</b>                                      |
| #5     | Search <b>"meat alternative"[Text Word]</b>                                           |
| #4     | Search <b>"meat substitute"[Title/Abstract]</b>                                       |
| #3     | Search <b>"meat substitute"[Text Word]</b>                                            |
| #2     | Search <b>"plant-based meat"[Title/Abstract]</b>                                      |
| #1     | Search <b>"plant-based meat"[Text Word]</b>                                           |

**Table S2.** One-study-removed analysis

| Outcome                 | N          | Removal    | Mean<br>Difference          | p-value            | p-value<br>for<br>heterogeneity | I <sup>2</sup> (%) |
|-------------------------|------------|------------|-----------------------------|--------------------|---------------------------------|--------------------|
| Study                   |            |            |                             |                    |                                 |                    |
| TC                      | 384        |            | -0.50 [-0.70, -0.29]        | <0.00001           | 0.002                           | 66                 |
| Azadbakht (2007)        | 342        | Yes        | -0.47 [-0.68, -0.26]        | <0.0001            | 0.002                           | 66                 |
| <b>Azadbakht (2008)</b> | <b>343</b> | <b>Yes</b> | <b>-0.61 [-0.91, -0.30]</b> | <b>&lt;0.0001</b>  | <b>0.001</b>                    | <b>69</b>          |
| Bakhtiary (2012)        | 334        | Yes        | -0.53 [-0.76, -0.29]        | <0.00001           | 0.0009                          | 70                 |
| <b>Bianchi (2021)</b>   | <b>270</b> | <b>Yes</b> | <b>-0.61 [-0.86, -0.36]</b> | <b>&lt;0.00001</b> | <b>0.006</b>                    | <b>62</b>          |
| Kestin (1989)           | 367        | Yes        | -0.49 [-0.71, -0.27]        | <0.0001            | 0.001                           | 69                 |
| <b>Ruxton (2010)</b>    | <b>369</b> | <b>Yes</b> | <b>-0.40 [-0.56, -0.23]</b> | <b>&lt;0.00001</b> | <b>0.05</b>                     | <b>49</b>          |
| Sirtori (1977)          | 364        | Yes        | -0.48 [-0.69, -0.28]        | <0.00001           | 0.02                            | 68                 |
| Ta (2022)               | 337        | Yes        | -0.52 [-0.74, -0.30]        | <0.00001           | 0.0009                          | 70                 |
| Turnbull (1990)         | 367        | Yes        | -0.45 [-0.66, -0.24]        | <0.0001            | 0.002                           | 63                 |
| Turnbull (1992)         | 363        | Yes        | -0.50 [-0.72, -0.29]        | <0.00001           | 0.0009                          | 70                 |
| LDL-C                   | 420        |            | -0.39 [-0.57, -0.21]        | <0.0001            | 0.0007                          | 67                 |

|       |                         |            |            |                             |                    |                    |           |
|-------|-------------------------|------------|------------|-----------------------------|--------------------|--------------------|-----------|
|       | Azadbakht (2007)        | 378        | Yes        | -0.44 [-0.66, -0.23]        | <0.0001            | 0.001              | 67        |
|       | Azadbakht (2008)        | 379        | Yes        | -0.34 [-0.51, -0.16]        | <0.0001            | 0.009              | 59        |
|       | Bakhtiary (2012)        | 370        | Yes        | -0.39 [-0.59, -0.20]        | <0.0001            | 0.0005             | 70        |
|       | <b>Bianchi (2021)</b>   | <b>306</b> | <b>Yes</b> | <b>-0.45 [-0.63, -0.27]</b> | <b>&lt;0.00001</b> | <b>0.01</b>        | <b>57</b> |
|       | Crimarco (2020)         | 384        | Yes        | -0.43 [-0.65, -0.21]        | 0.0001             | 0.0004             | 70        |
|       | Kestin (1989)           | 403        | Yes        | -0.38 [-0.56, -0.19]        | <0.0001            | 0.0007             | 69        |
|       | Ruxton (2010)           | 405        | Yes        | -0.38 [-0.57, -0.20]        | <0.0001            | 0.0005             | 69        |
|       | Sirtori (1977)          | 400        | Yes        | -0.39 [-0.57, -0.20]        | <0.0001            | 0.0005             | 70        |
|       | Ta (2022)               | 373        | Yes        | -0.41 [-0.61, -0.22]        | <0.0001            | 0.0004             | 70        |
|       | <b>Turnbull (1990)</b>  | <b>403</b> | <b>Yes</b> | <b>-0.33 [-0.49, -0.16]</b> | <b>0.0001</b>      | <b>0.01</b>        | <b>58</b> |
|       | Turnbull (1992)         | 399        | Yes        | -0.39 [-0.58, -0.20]        | <0.0001            | 0.0004             | 70        |
| <hr/> |                         |            |            |                             |                    |                    |           |
| HDL-C |                         | 400        |            | 0.01 [-0.02, 0.05]          | 0.44               | 0.28               | 18        |
|       | Azadbakht (2007)        | 358        | Yes        | 0.02 [-0.03, 0.08]          | 0.34               | 0.24               | 23        |
|       | Azadbakht (2008)        | 359        | Yes        | 0.02 [-0.02, 0.06]          | 0.45               | 0.21               | 26        |
|       | Bakhtiary (2012)        | 350        | Yes        | 0.01 [-0.03, 0.05]          | 0.66               | 0.28               | 19        |
|       | Bianchi (2021)          | 286        | Yes        | 0.02 [-0.02, 0.06]          | 0.39               | 0.21               | 27        |
|       | Crimarco (2020)         | 364        | Yes        | 0.02 [-0.03, 0.06]          | 0.48               | 0.21               | 26        |
|       | Kestin (1989)           | 383        | Yes        | 0.02 [-0.01, 0.05]          | 0.21               | 0.58               | 0         |
|       | Ruxton (2010)           | 385        | Yes        | 0.02 [-0.02, 0.06]          | 0.45               | 0.21               | 26        |
|       | Ta (2022)               | 353        | Yes        | 0.01 [-0.03, 0.31]          | 0.54               | 0.26               | 21        |
|       | Turnbull (1990)         | 383        | Yes        | 0.00 [-0.03, 0.03]          | 0.84               | 0.63               | 0         |
|       | Turnbull (1992)         | 379        | Yes        | 0.02 [-0.02, 0.06]          | 0.42               | 0.21               | 27        |
| <hr/> |                         |            |            |                             |                    |                    |           |
| TG    |                         | 420        |            | -0.15 [-0.29, -0.01]        | 0.04               | <0.00001           | 79        |
|       | Azadbakht (2007)        | 378        | Yes        | -0.19 [-0.40, 0.02]         | 0.08               | <0.00001           | 81        |
|       | Azadbakht (2008)        | 379        | Yes        | -0.15 [-0.30, 0.00]         | 0.05               | <0.00001           | 81        |
|       | Bakhtiary (2012)        | 370        | Yes        | -0.16 [-0.32, -0.01]        | 0.04               | <0.00001           | 81        |
|       | Bianchi (2021)          | 306        | Yes        | -0.18 [-0.34, -0.01]        | 0.03               | <0.00001           | 81        |
|       | Crimarco (2020)         | 384        | Yes        | -0.19 [-0.37, -0.00]        | 0.05               | <0.00001           | 81        |
|       | <b>Kestin (1989)</b>    | <b>403</b> | <b>Yes</b> | <b>-0.20 [-0.34, -0.05]</b> | <b>0.009</b>       | <b>&lt;0.00001</b> | <b>79</b> |
|       | Ruxton (2010)           | 405        | Yes        | -0.12 [-0.26, 0.02]         | 0.10               | <0.00001           | 79        |
|       | <b>Sirtori (1977)</b>   | <b>400</b> | <b>Yes</b> | <b>-0.05 [-0.14, 0.04]</b>  | <b>0.31</b>        | <b>0.06</b>        | <b>45</b> |
|       | Ta (2022)               | 373        | Yes        | -0.14 [-0.28, 0.00]         | 0.05               | <0.00001           | 81        |
|       | Turnbull (1990)         | 403        | Yes        | -0.15 [-0.30, 0.00]         | 0.06               | <0.00001           | 81        |
|       | Turnbull (1992)         | 399        | Yes        | -0.16 [-0.31, -0.01]        | 0.03               | <0.00001           | 81        |
| <hr/> |                         |            |            |                             |                    |                    |           |
| FBG   |                         | 231        |            | -0.08 [-0.23, 0.08]         | 0.33               | 0.07               | 52        |
|       | <b>Azadbakht (2007)</b> | <b>189</b> | <b>Yes</b> | <b>-0.16 [-0.43, 0.11]</b>  | <b>0.24</b>        | <b>0.05</b>        | <b>58</b> |
|       | <b>Azadbakht (2008)</b> | <b>190</b> | <b>Yes</b> | <b>-0.06 [-0.19, 0.07]</b>  | <b>0.38</b>        | <b>0.13</b>        | <b>44</b> |
|       | Bakhtiary (2012)        | 181        | Yes        | -0.01 [-0.16, 0.14]         | 0.87               | 0.21               | 32        |
|       | <b>Crimarco (2020)</b>  | <b>195</b> | <b>Yes</b> | <b>-0.16 [-0.40, 0.08]</b>  | <b>0.20</b>        | <b>0.06</b>        | <b>55</b> |
|       | Ruxton (2010)           | 216        | Yes        | -0.07 [-0.22, 0.08]         | 0.37               | 0.06               | 55        |
|       | Ta (2022)               | 184        | Yes        | -0.07 [-0.23, 0.09]         | 0.38               | 0.05               | 59        |
| <hr/> |                         |            |            |                             |                    |                    |           |
| SBP   |                         | 339        |            | -0.32 [-1.79, 1.14]         | 0.67               | 0.29               | 18        |

|                         |            |            |                             |             |             |           |
|-------------------------|------------|------------|-----------------------------|-------------|-------------|-----------|
| <b>Azadbakht (2007)</b> | <b>297</b> | <b>Yes</b> | <b>-0.80 [-2.52, 0.93]</b>  | <b>0.37</b> | <b>0.30</b> | <b>17</b> |
| Azadbakht (2008)        | 298        | Yes        | -0.41 [-2.01, 1.19]         | 0.62        | 0.20        | 32        |
| <b>Bakhtiary (2012)</b> | <b>289</b> | <b>Yes</b> | <b>0.22 [-1.17, 1.62]</b>   | <b>0.75</b> | <b>0.40</b> | <b>2</b>  |
| Bianchi (2021)          | 225        | Yes        | -0.62 [-2.61, 1.36]         | 0.54        | 0.20        | 32        |
| Crimarco (2020)         | 303        | Yes        | -0.75 [-2.42, 0.93]         | 0.38        | 0.30        | 18        |
| Kestin (1989)           | 322        | Yes        | -0.19 [-1.73, 1.35]         | 0.81        | 0.26        | 23        |
| Margetts (1985)         | 300        | Yes        | 0.01 [-1.25, 1.28]          | 0.98        | 0.47        | 0         |
| DBP                     | 339        |            | 0.49 [-0.30, 1.28]          | 0.23        | 0.63        | 0         |
| <b>Azadbakht (2007)</b> | <b>297</b> | <b>Yes</b> | <b>-0.30 [-1.56, 0.97]</b>  | <b>0.65</b> | <b>0.87</b> | <b>0</b>  |
| Azadbakht (2008)        | 298        | Yes        | 0.50 [-0.30, 1.29]          | 0.22        | 0.55        | 0         |
| Bakhtiary (2012)        | 289        | Yes        | 0.56 [-0.26, 1.38]          | 0.18        | 0.57        | 0         |
| Bianchi (2021)          | 225        | Yes        | 0.54 [-0.36, 1.44]          | 0.24        | 0.51        | 0         |
| <b>Crimarco (2020)</b>  | <b>303</b> | <b>Yes</b> | <b>0.57 [-0.25, 1.39]</b>   | <b>0.17</b> | <b>0.60</b> | <b>0</b>  |
| Kestin (1989)           | <b>322</b> | Yes        | 0.52 [-0.28, 1.32]          | 0.20        | 0.54        | 0         |
| <b>Margetts (1985)</b>  | <b>300</b> | <b>Yes</b> | <b>0.57 [-0.23, 1.38]</b>   | <b>0.16</b> | <b>0.77</b> | <b>0</b>  |
| Weight                  | 294        |            | -0.12 [-1.52, 1.27]         | 0.86        | 0.93        | 0         |
| <b>Azadbakht (2007)</b> | <b>252</b> | <b>Yes</b> | <b>-0.58 [-2.28, -1.13]</b> | <b>0.51</b> | <b>1.00</b> | <b>0</b>  |
| Azadbakht (2008)        | 253        | Yes        | -0.07 [-1.51, 1.37]         | 0.93        | 0.85        | 0         |
| <b>Bakhtiary (2012)</b> | <b>244</b> | <b>Yes</b> | <b>0.31 [-1.68, 2.30]</b>   | <b>0.76</b> | <b>0.91</b> | <b>0</b>  |
| Bianchi (2021)          | 180        | Yes        | -0.09 [-1.51, 1.34]         | 0.90        | 0.85        | 0         |
| Ta (2022)               | 247        | Yes        | -0.12 [-1.56, 1.33]         | 0.87        | 0.83        | 0         |

**Table S3.** Mean differences in outcomes adjusted for zero percent heterogeneity

| Outcome | N   | Mean<br>Difference   | p-value  | p-value<br>for<br>heterogeneity |   |
|---------|-----|----------------------|----------|---------------------------------|---|
|         |     |                      |          | I <sup>2</sup> (%)              |   |
|         |     |                      |          |                                 |   |
| TC      | 238 | -0.32 [-0.38, -0.26] | <0.00001 | 0.66                            | 0 |
| LDL-C   | 228 | -0.60 [-0.76, -0.43] | <0.00001 | 0.48                            | 0 |
| HDL-C   | 383 | 0.02 [-0.01, 0.05]   | 0.21     | 0.58                            | 0 |
| TG      | 368 | -0.05 [-0.08, -0.01] | 0.008    | 0.74                            | 0 |
| FBG     | 140 | 0.01 [-0.08, 0.10]   | 0.87     | 0.48                            | 0 |
| SBP     | 300 | 0.01 [-1.25, 1.28]   | 0.98     | 0.47                            | 0 |
| DBP     | 339 | 0.49 [-0.30, 1.28]   | 0.23     | 0.63                            | 0 |
| Weight  | 294 | -0.12 [-1.52, 1.27]  | 0.86     | 0.93                            | 0 |

**Table S4.** Results of meta-regression including age, study duration, sample size, baseline BMI, and sex

| <b>Modifier</b> | <b>Dependent variable</b> | <b>Coefficients</b>                     |
|-----------------|---------------------------|-----------------------------------------|
| Age             | Total cholesterol         | 0.0084 [-0.0232, 0.0310], p=0.602       |
|                 | LDL-cholesterol           | -0.0142 [-0.0288, 0.0003], p=0.055      |
|                 | Triglycerides             | -0.0026 [-0.0224, 0.01715], p=0.794     |
| Duration        | Total cholesterol         | 0.0014 [-0.0021, 0.0050], p=0.433       |
|                 | LDL-cholesterol           | -0.0018 [-0.0047, 0.0010], p=0.210      |
|                 | Triglycerides             | 0.0001 [-0.0036, 0.0038], p=0.962       |
| Sample size     | <b>Total cholesterol</b>  | <b>0.0072 [0.0017, 0.0127], p=0.010</b> |
|                 | <b>LDL-cholesterol</b>    | <b>0.0066 [0.0014, 0.0117], p=0.012</b> |
|                 | Triglycerides             | 0.0029 [-0.0045, 0.0102], p=0.445       |
| Baseline BMI    | Total cholesterol         | -0.0433 [-0.2428, 0.1563], p=0.671      |
|                 | LDL-cholesterol           | -0.0483 [-0.1808, 0.0842], p=0.475      |
|                 | Triglycerides             | -0.0307 [-0.1228, 0.0614], p=0.514      |
| Sex             | Total cholesterol         | -0.0000 [-0.0079, 0.0078], p=0.997      |
|                 | LDL-cholesterol           | -0.0037 [-0.0111, 0.0037], p=0.324      |
|                 | Triglycerides             | 0.0015 [-0.0059, 0.0090], p=0.687       |

**Table S5.** P values of Egger's test and Begg's test

| <b>Outcome</b>    | <b>Egger's test</b> | <b>Begg's test</b> |
|-------------------|---------------------|--------------------|
| Total cholesterol | 0.066               | 0.089              |
| LDL cholesterol   | 0.044               | 0.274              |
| HDL cholesterol   | 0.354               | 0.468              |
| Triglycerides     | 0.270               | 0.059              |

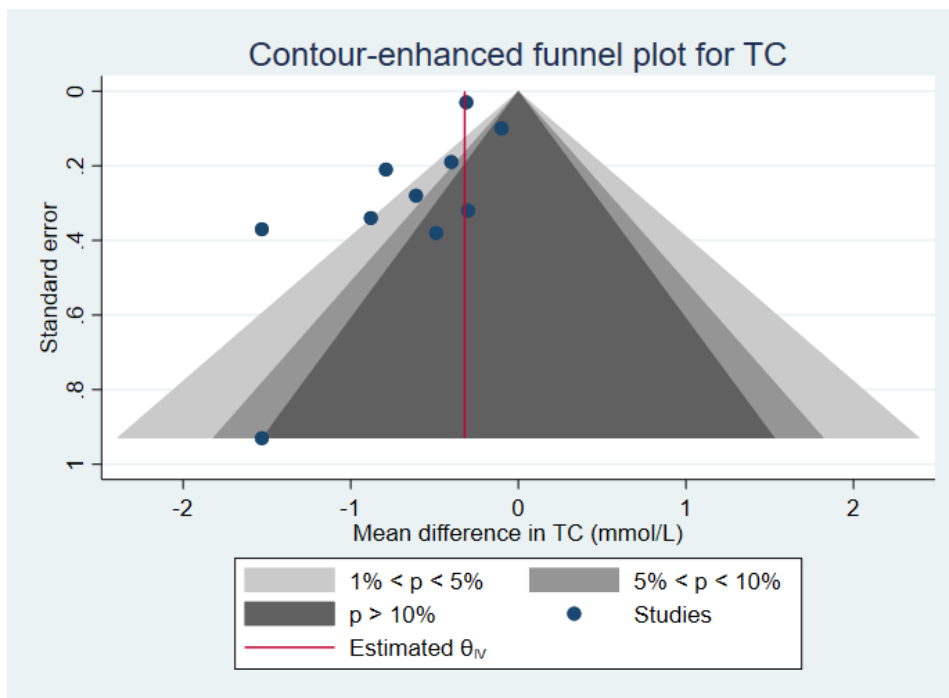

**Figure S1.** Publication bias funnel plot for total cholesterol concentration

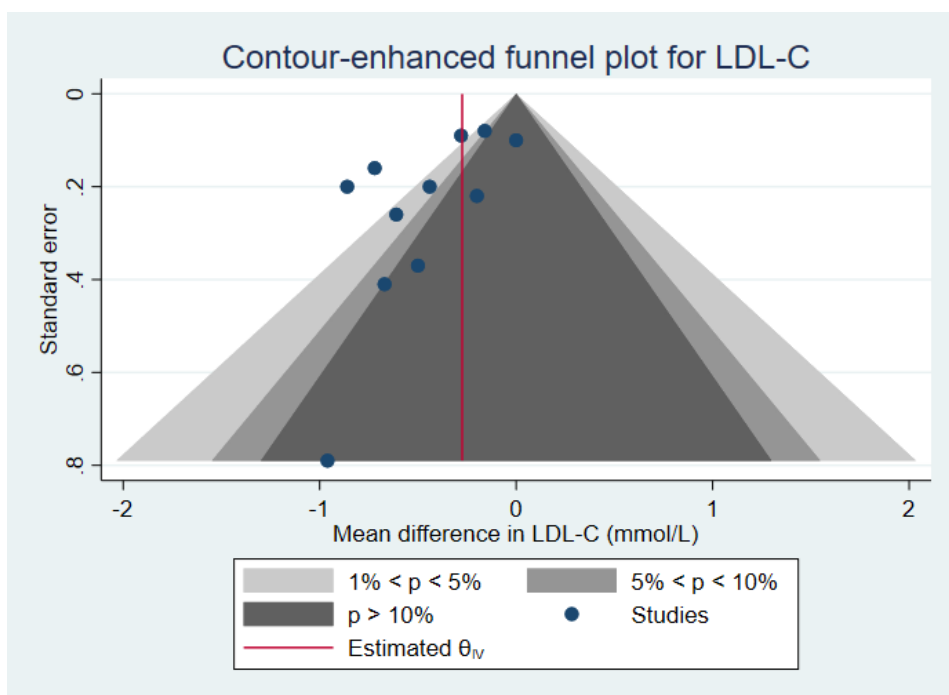

**Figure S2.** Publication bias funnel plot for LDL-cholesterol concentration

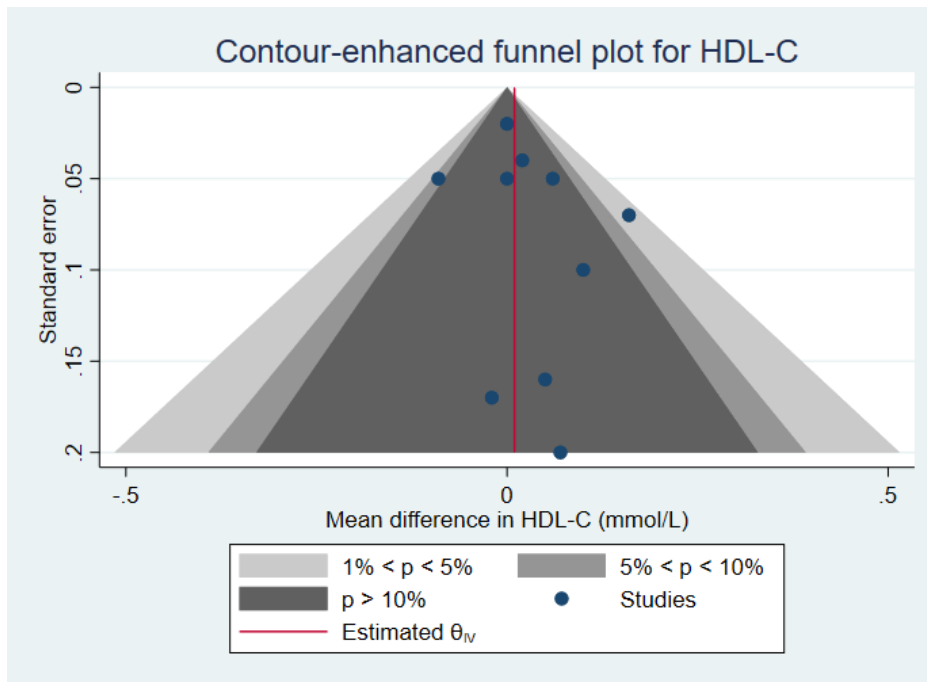

**Figure S3.** Publication bias funnel plot for HDL-cholesterol concentration

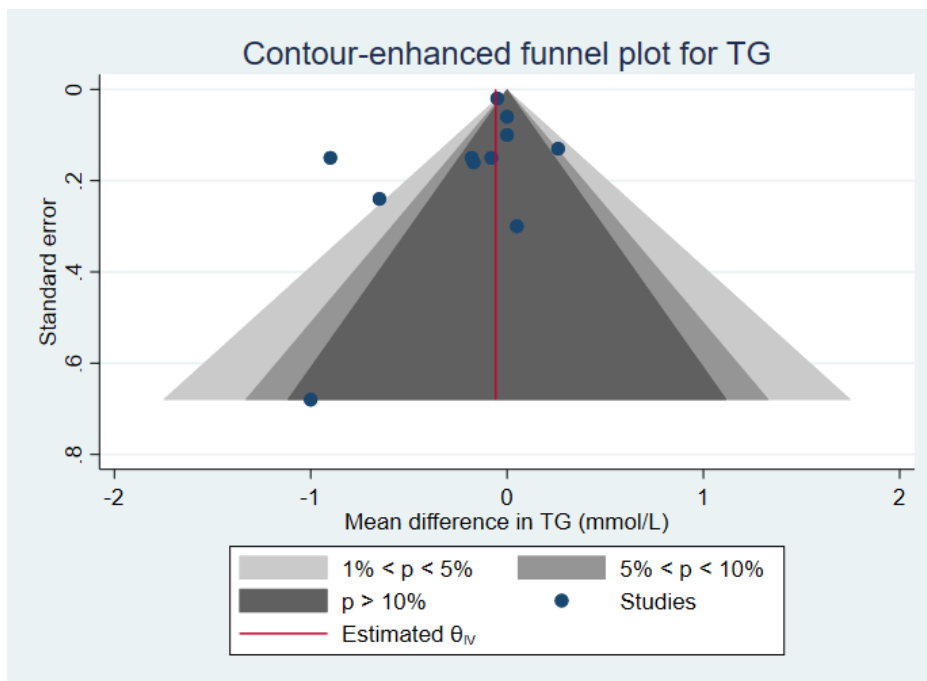

**Figure S4.** Publication bias funnel plot for triglyceride concentration

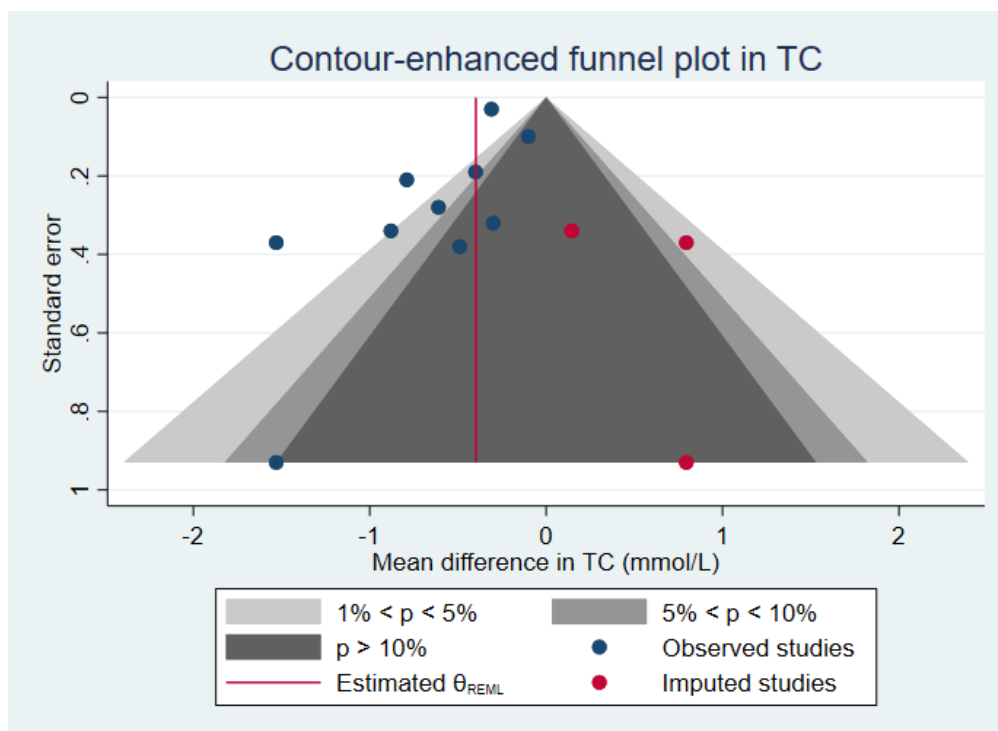

**Figure S5.** Trim and fill funnel plot for total cholesterol concentration

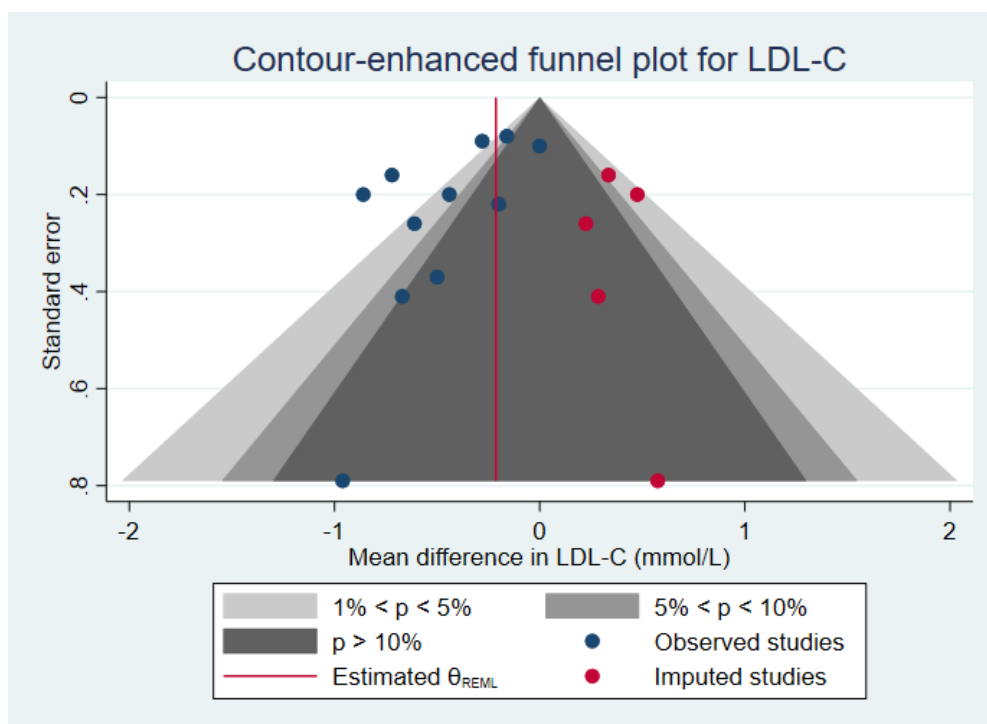

**Figure S6.** Trim and fill funnel plot for LDL-cholesterol concentration

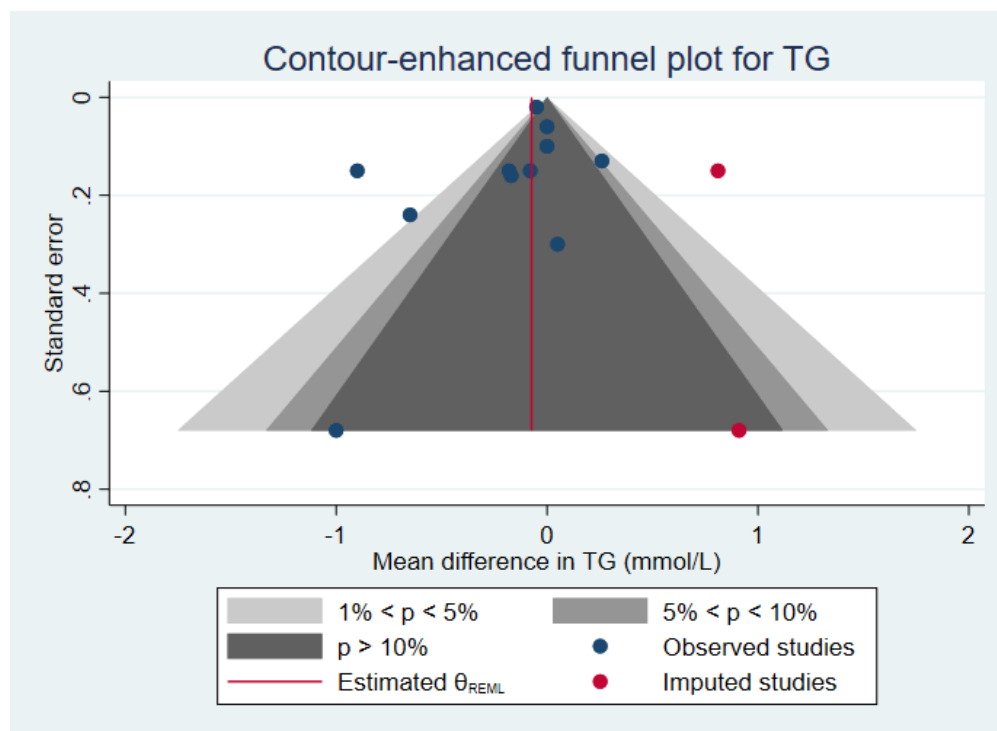

**Figure S7.** Trim and fill funnel plot for triglyceride concentration
